# Supplementary material
Source: publisher figshare collection journal article supplement (https://gsajournals.figshare.com/ndownloader/files/24087113)
Supplement: Supplementary file 1 [file 24087113]

## Sheet: Table S2 primers
Name	Sequence
C1	TAAGGGCGTGTATGTCGTTACATCAGATGAACATCCCAAAACCCTCCGGATCCCCGGGTTAATTAA
C2	TTGCCATACTATGTAAATTGATATTAATTTGGCACTTTTAAATTATACTTTCTGCGCACTTAACT
D1	TTAGTGAAGAGATGTAAAGCCCATTCTCACGTATTTCAAGAAATTCTTCTGCTGCGTATTATTCTGC
D2	ATTGATATTAATTTGGCACTTTTAAATTATTAAATTGCCTTCTACTTAAGCTGCTGCGGAGCTT
N1	ACCATTTTTCCCTCATCGGCACATTAAAGCTGGATGACCATCCCACTTCTGCTGCGTATTATTCTGC
N2	TGAAACCTTATTTTCGCTAGTCTTTGATACGGCGTATTTCATATGTTAAGCTGCTGCGGAGCTT
V1	CTTGTCTTTTTCACCACCCA
V2	GCATTGTCCTGGAAAATGTC
V3	GCACAGATAAACTGGTGCAGTG
V4	CCCTCGATCTCGAACTCGTG
V5	CTATCGCGATGATGTTCCGA
V6	TATAAATTGGTGCGTAAAATCGTTGGATCTCTCTTCTAAGTACATATGACAAAACCTCTTCCGAT
V7	CTGTAAGCGTTGATTTCTATGTATGAAGTCCACATTTGATGTAATCCCTCCTCCTTGTCAATATT
V8	GAGCGGTCGACCGGCGAAAAGTTGATTGAAAC
V9	GATATGCGGCCGCTTAGAGGGTTTTGGGATGTTC
V10	ACATACATAAACATACGCGC
V11	AATGGTCAGGTCATTGAGTG
T1	TAAAAAACCAAACAAAGCAAAGAATACAATAGCAACGCAAGATCAACACA-ATGACCATCCCAGTATCC
T2	AGCTCGAATTGTGGTTGGTAGGGCAAAAACAAAGATGCCACGATGAGAGC-CTTTGATACGGCGTATTTCAT
T3	atcGCAACGCAAGATCAACACAA
T4	aacTTGTGTTGATCTTGCGTTGC
